# Supplementary material for: Differences in trunk accelerometry between frail and non-frail elderly persons in functional tasks
Source: Springer Nature journal article supplement (doi:10.1186/1756-0500-7-100), 2014-02-21

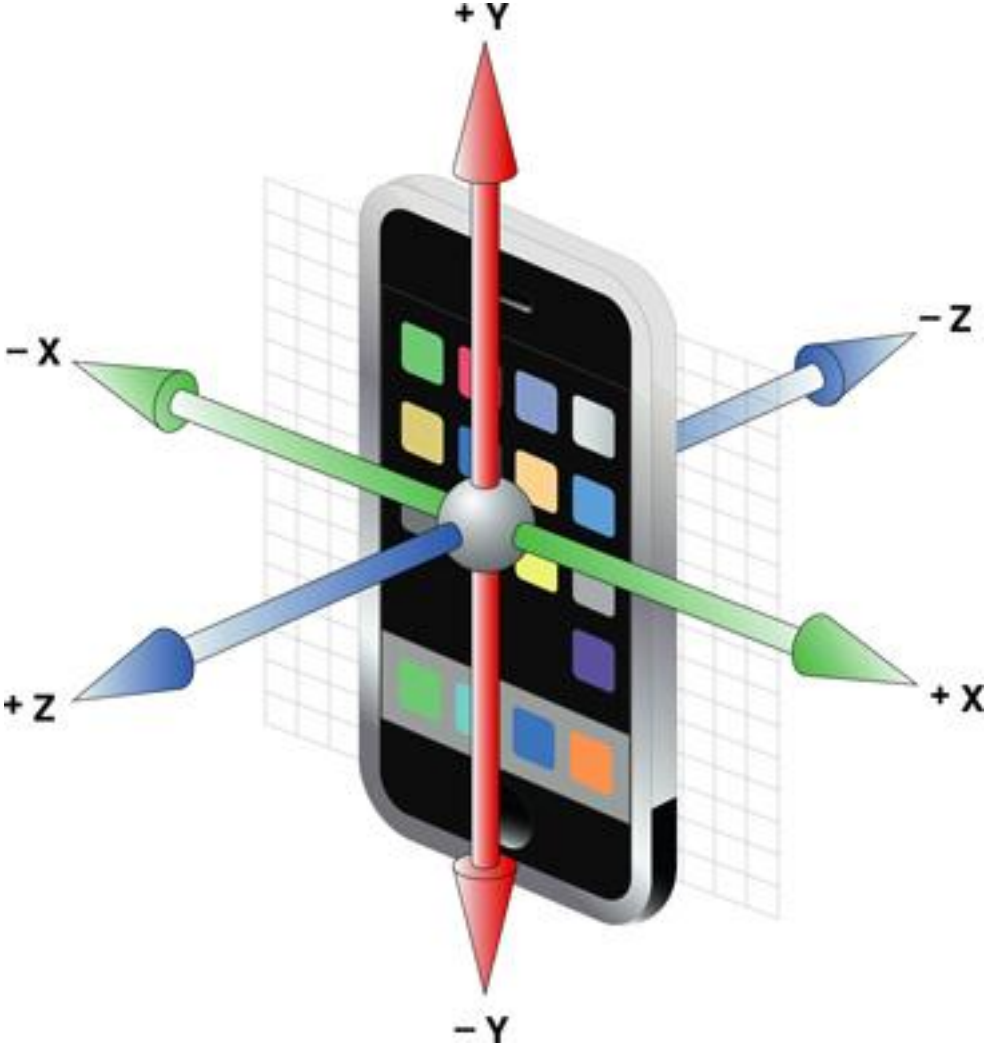

Supplement: 13104_2013_2671_MOESM1_ESM.pdf [file 13104_2013_2671_MOESM1_ESM.pdf]
